# Supplementary material
Source: publisher site journal article supplement (https://www.spandidos-publications.com/5027/downloadSupplementary)

Figure S1. Salidroside attenuates the regulation of apoptosis-related proteins in model mice. (A) The levels of apoptosis-related proteins (B) Bcl-2, (C) Bax and (D) cleaved-caspase-3 were analyzed by western blotting and GAPDH was served as the internal reference. The data were presented as the mean  $\pm$  standard deviation of three independent experiments; \*\*\* $P$ <0.001 vs. sham; ## $P$ <0.01 vs. model, ### $P$ <0.001; ^^ $P$ <0.01; ^^ $P$ <0.001 vs. salidroside (160 mg/kg). p, phosphorylation.

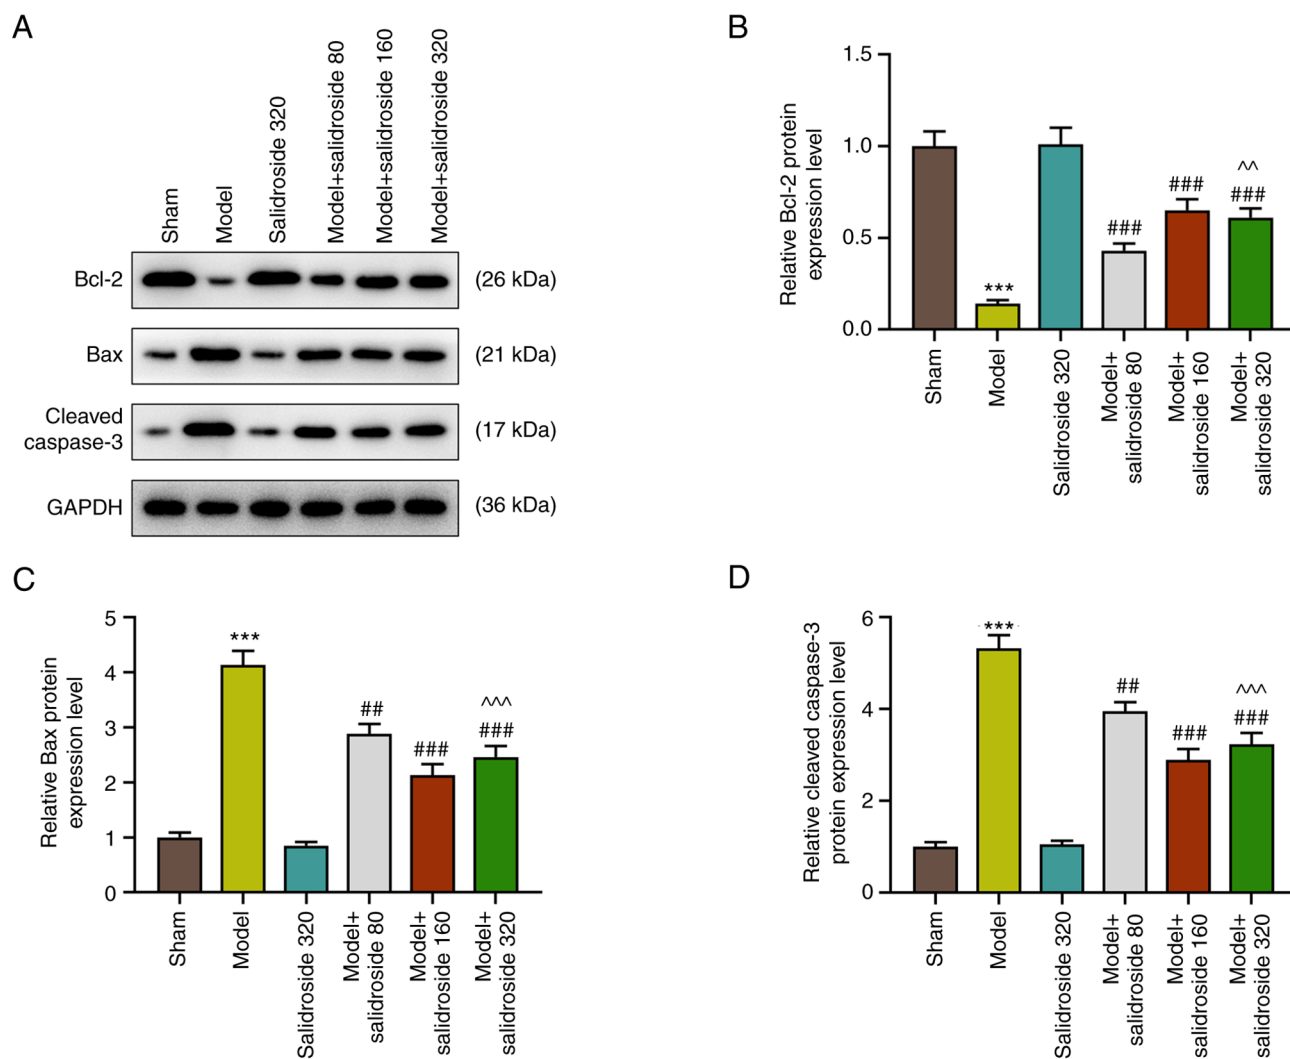

Figure S2. Anti-IL-17A attenuates apoptosis in sepsis mice treated with salidroside. (A) The levels of apoptosis-related proteins (B) Bcl-2, (C) Bax and (D) cleaved-caspase-3 were analyzed by western blotting and GAPDH was served as the internal reference. The data were presented as the mean  $\pm$  standard deviation of three independent experiments; \*\*\* $P$ <0.001 vs. sham; ### $P$ <0.001 vs. model; ^ $P$ <0.05; ^^ $P$ <0.001 vs. salidroside (160 mg/kg); § $P$ <0.05; §§ $P$ <0.01 vs. model + anti-IL-17A. p, phosphorylation.

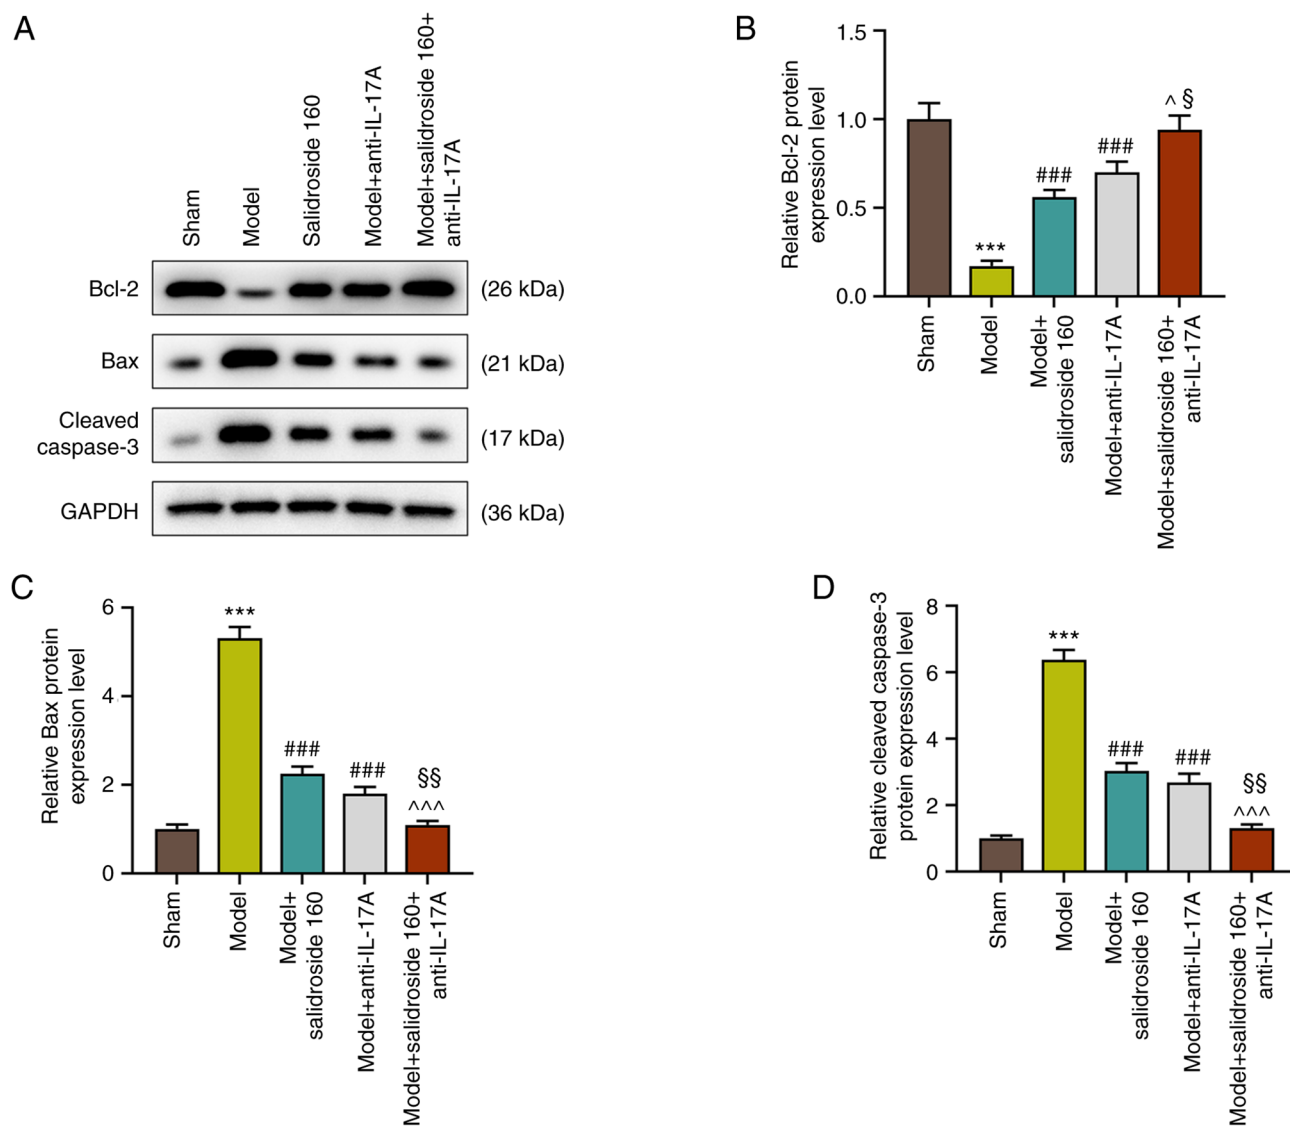

Figure S3. An abstract figure of the salidroside associated mechanisms of action against the sepsis model to mitigate the inflammation. CLP, cecal ligation and puncture.

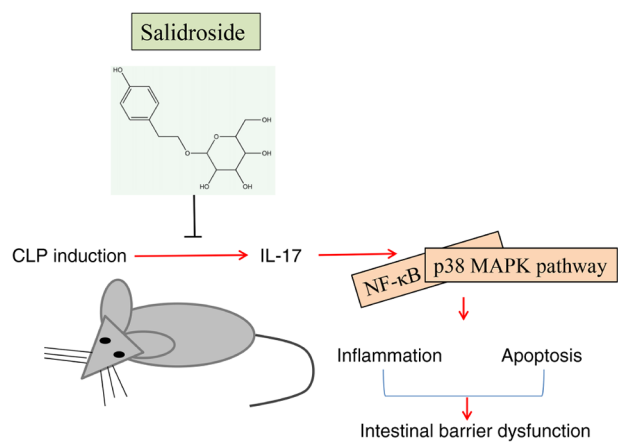

Supplement: Supplementary file 1 [file downloadSupplementary]
